# Supplementary material for: A Novel Anti-HER2 Bispecific Antibody With Potent Tumor Inhibitory Effects In Vitro and In Vivo
Source: Frontiers journal article supplement (doi:10.3389/fimmu.2020.600883), 2021-02-17
Supplement: Data_Sheet_2.pdf [file Data_Sheet_2.pdf]

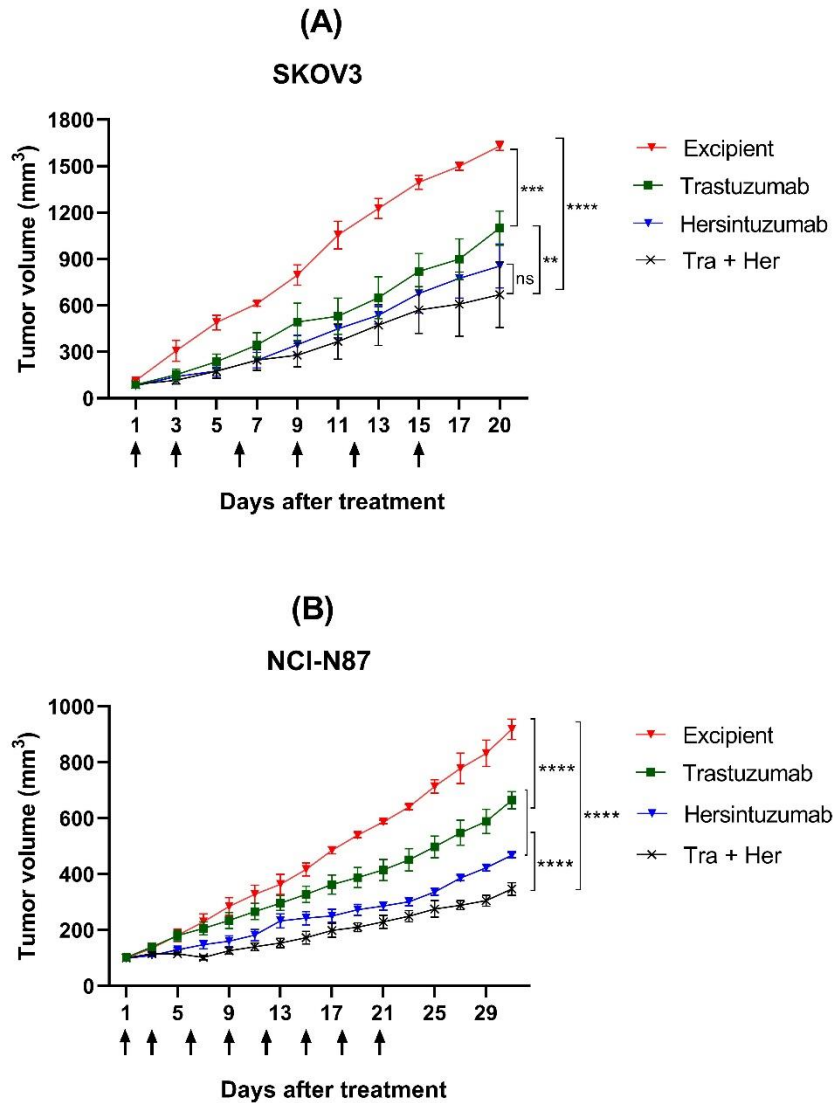

**Supplementary Figure 2.** Comparative anti-proliferative effects of trastuzumab, hersintuzumab and their combination in nude mice. SKOV-3 (A) and NCI-N87 (B) xenograft tumor bearing nude mice were treated twice a week with a combination of trastuzumab plus hersintuzumab (5 mg/kg of each), or each mAb alone (10 mg/kg) for 2-3 consecutive weeks. The control group received excipient alone. Tumor sizes were measured three times a week. Data is shown as mean  $\pm$  SEM. \*\*\*\* $P < 0.0001$ , \*\*\* $P < 0.001$ , \*\* $P < 0.01$ , ns: non-significant. Tra: trastuzumab. Her: hersintuzumab. Arrows show timing of mAb administration.
